# Supplementary material for: The dehydrogenation mechanism during the incubation period in nanocrystalline MgH2
Source: Royal Society of Chemistry journal article supplement (doi:10.1039/c6cp07926a), 2017-01-01
Supplement: c6cp07926a1.pdf [file c6cp07926a1.pdf]

## Supplementary Information

### On the dehydrogenation mechanism during incubation period in nanocrystalline $\text{MgH}_2$

Apurva Shantilal Gangrade, Akhil Aditya Varma, Nikhil Kishor Gor, Sweta Shrinivasan,

Sankara Sarma V. Tatiparti\*

Department of Energy Science & Engineering, Indian Institute of Technology

Bombay, Mumbai-400076, India

\*Corresponding author Email: [sankara@iitb.ac.in](mailto:sankara@iitb.ac.in)

## S1. Refinement parameters obtained from XRD patterns

Table S1 (A) Atomic parameters of MgH<sub>2</sub> refined from the XRD patterns of the powders dehydrogenated at 320 and 350 °C

| Temperature<br>(°C) | Time | Positional parameters |              | B (Å <sup>2</sup> ) |           |            |
|---------------------|------|-----------------------|--------------|---------------------|-----------|------------|
|                     |      | H (4f)                |              | Mg                  | H         |            |
| 320 °C              | 0    | 0.30787(303)          | 0.30787(303) | 0                   | 0.146(56) | 1.292(774) |
|                     | 35   | 0.32391(343)          | 0.32391(343) | 0                   | 1.122(0)  | 1.382(0)   |
|                     | 60   | 0.31172(248)          | 0.31172(248) | 0                   | 0.704(0)  | 0.363(0)   |
| 350 °C              | 0    | 0.31173(208)          | 0.31173(208) | 0                   | 0.672(0)  | 0.85(0)    |
|                     | 5    | 0.32419(717)          | 0.32419(717) | 0                   | 1.988(0)  | 0.25(0)    |
|                     | 11   | 0.31720(536)          | 0.31720(536) | 0                   | 0.02(43)  | 1.293(873) |

Table S1 (B) Unit cell parameters of MgH<sub>2</sub> refined from the XRD patterns of the powders dehydrogenated at 320 and 350 °C

| Temperature<br>(°C) | Time<br>(min) | <i>a</i> (Å) | <i>c</i> (Å) | <i>c/a</i>   | Unit cell<br>Volume (Å <sup>3</sup> ) |
|---------------------|---------------|--------------|--------------|--------------|---------------------------------------|
| 320                 | 0             | 4.5187(1.2)  | 3.0218(1.4)  | 0.6687(.270) | 61.7008(674)                          |
|                     | 35            | 4.5141(1.5)  | 3.0185(1.8)  | 0.6687(.100) | 61.5095(430)                          |
|                     | 60            | 4.5148(1.1)  | 3.0192(1.3)  | 0.6687(.097) | 61.5417(244)                          |
| 350                 | 0             | 4.5186(0.8)  | 3.0221(.9)   | 0.6688(.038) | 61.7040(186)                          |
|                     | 5             | 4.5165(3.4)  | 3.0207(3.4)  | 0.6688(.038) | 61.6171(315)                          |
|                     | 11            | 4.5183(1.2)  | 3.0220(1.4)  | 0.6688(.076) | 61.6940(128)                          |

Table S1 (C) Agreement parameters of MgH<sub>2</sub> refined from the XRD patterns of the powders dehydrogenated at 320 and 350 °C

| Temperature (°C) | Time | $R_p$ | $R_{wp}$ | $R_{exp}$ | $\chi^2$ |
|------------------|------|-------|----------|-----------|----------|
| 320 °C           | 0    | 4.61  | 7.95     | 2.60      | 9.35     |
|                  | 35   | 6.47  | 9.73     | 3.52      | 7.63     |
|                  | 60   | 4.95  | 7.08     | 3.53      | 4.03     |
| 350 °C           | 0    | 4.20  | 6.13     | 2.57      | 5.70     |
|                  | 5    | 6.92  | 10.9     | 3.59      | 9.17     |
|                  | 11   | 6.48  | 10.6     | 4.05      | 6.80     |

where  $R_p$  is profile factor  $R_{wp}$  is weighted profile factor,  $R_{exp}$  is expected weighted profile factor and  $\chi^2$  goodness of fit indicator.

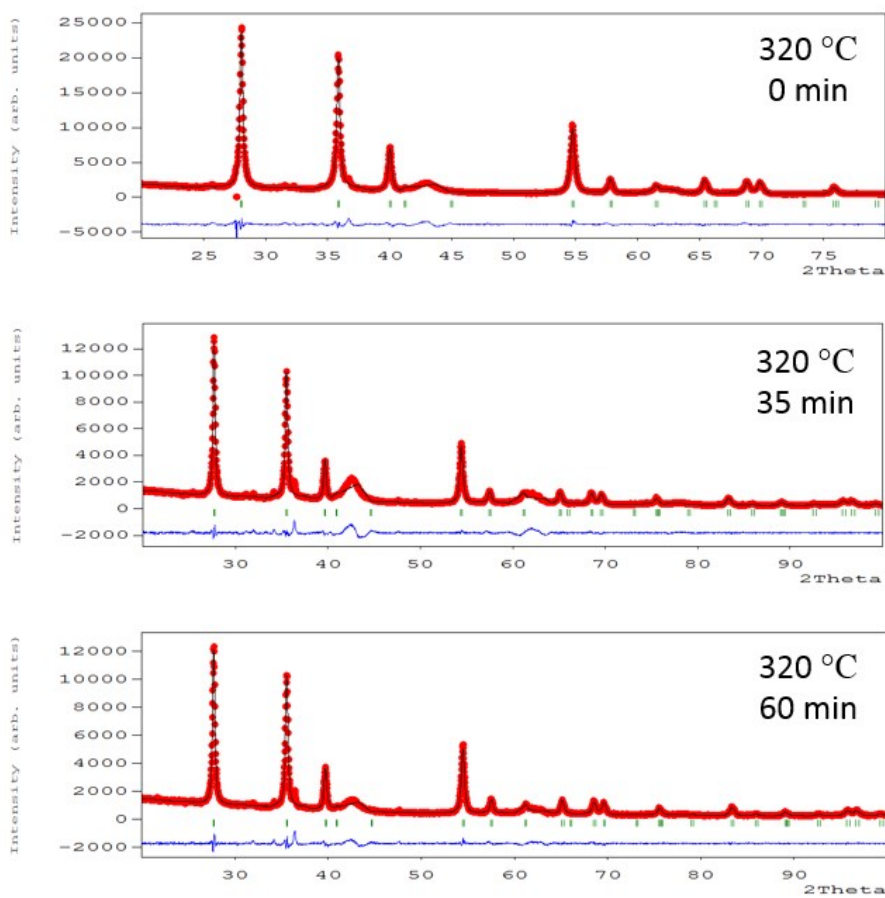

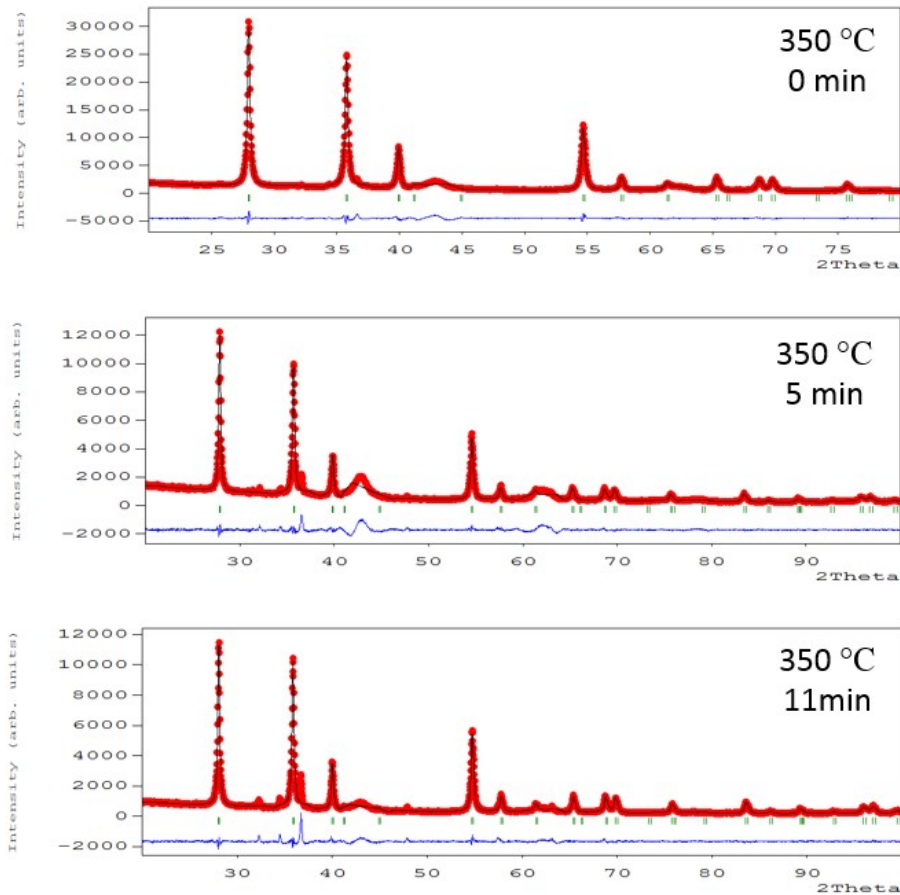

Fig. S1 Refined XRD curves of powders dehydrogenated at 320 and 350 °C.

## S2. Volume fraction analysis of phases observed in TEM diffraction patterns

The following steps are implemented to estimate the fraction of Mg formed at different regimes of the Dark Field images:

1. Particle in the TEM was divided into smaller contours by normalizing the distance of surface from the centroid.
2. Area of Mg in the respective contours, total area of all the contours, aspect ratio and centroid was calculated by using ImageJ software (Version 1.48).
3. Area to volume conversion has been done by the stereographic conversion from 2D to 3D as described by Sahagian and Prousevitch<sup>1</sup>. This conversion was done using the area fraction ( $N_{Ai}$ ) of each particle and its corresponding aspect ratio using

ImageJ software. Using the average aspect ratio, the area fraction ( $N_{Ai}$ ) was converted to the corresponding volume fraction ( $N_{Vi}$ ) using the literature conversion factor in terms of probabilities ( $P_{i,j+1}$ ) and using the Eq.1<sup>1</sup>.

$$N_{Vi} = \frac{1}{P_{i,1}H'_i} \left( N_{Ai} - \sum_{j=1}^{i-1} P_{i,j+1}H'_{i+1}N_{Vi(i-j)} \right) \quad (1)$$

where,

$P_{i,j+1}$  = intersection probabilities of particle geometry (obtained from literature based on aspect ratio and class size)

$H'_i$  = mean projected height corresponding to the area.  $P_{i,j+1}$ .

Using Eq.1, volume fraction distribution of dehydrogenated MgH<sub>2</sub> powders is obtained.

Based on these calculations the volume fractions are represented as follows

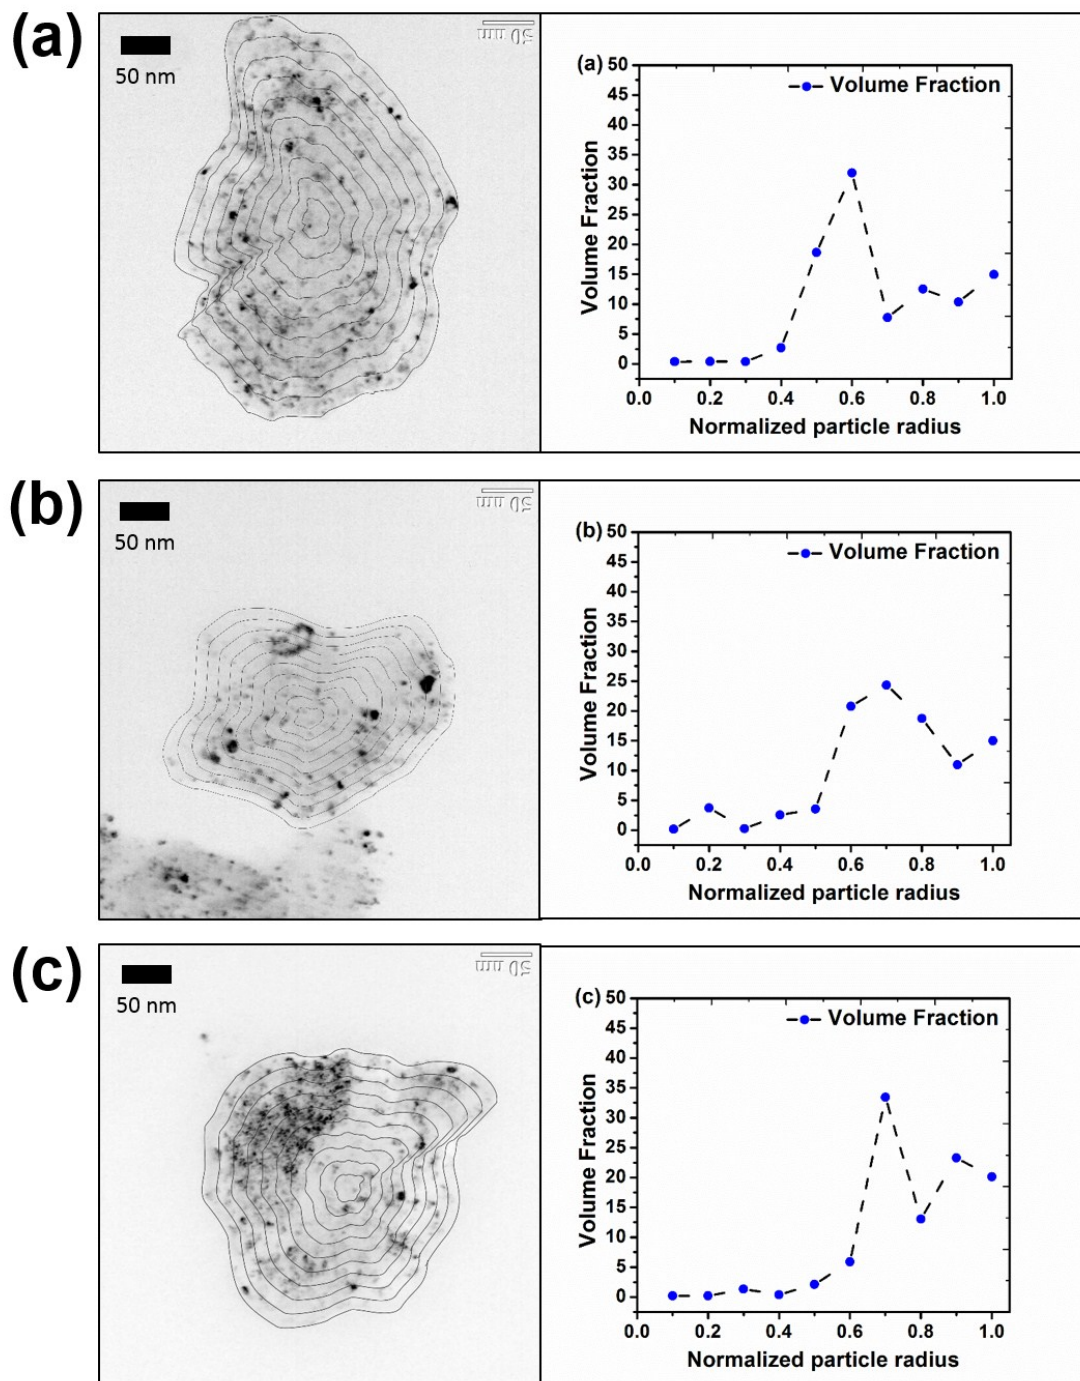

Fig. S2 (A) Volume fraction analysis of Mg phase in powders dehydrogenated at 320 °C.

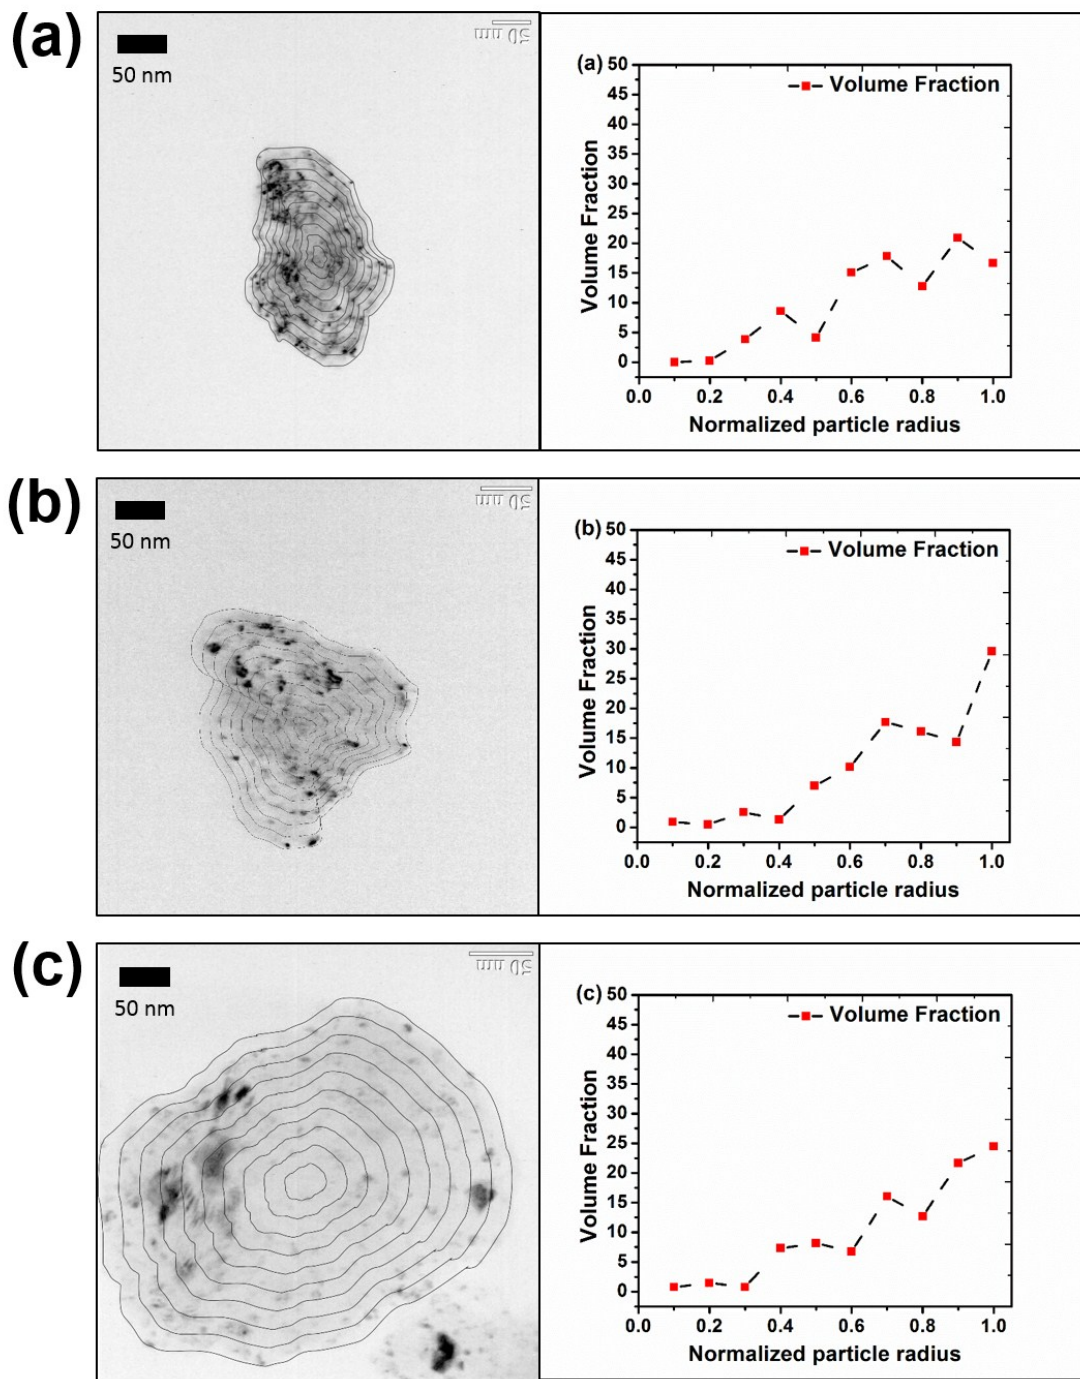

Fig. S2 (B) Volume fraction analysis of Mg phase in powders dehydrogenated at 350 °C.

### S3. Charge density distribution maps

The charge density maps were obtained from Fourier transforms of the observed structure factors using maximum entropy method (MEM) using Fullprof Suite program. The  $F$ -constraint to the MEM scattering data is given by Eq.2<sup>2</sup>

$$C_F = \chi_{aim}^2 + \frac{1}{N_F} \left( \frac{|F_{obs}(H_i) - F_{MEM}(H_i)|}{\sigma(H_i)} \right)^2 = 0 \quad (2)$$

where,  $H_i$  is the scattering vector of Bragg reflection,  $F_{obs}(H_i)$  is the observed structural factor of  $H_i$ ,  $F_{MEM}(H_i)$  is the structure factor for MEM,  $N_F$  is the number of reflections,  $\sigma(H_i)$  is the standard deviation in  $H_i$ , for convergence criterion  $\chi_{aim}^2$  is set to 1. The Fourier transform of  $F_{MEM}(H_i)$  gives the respective charge density distribution maps<sup>2</sup>.



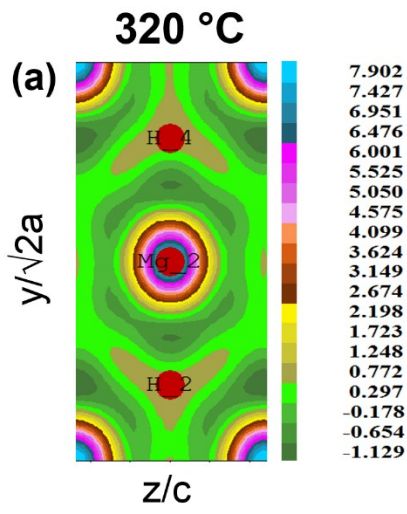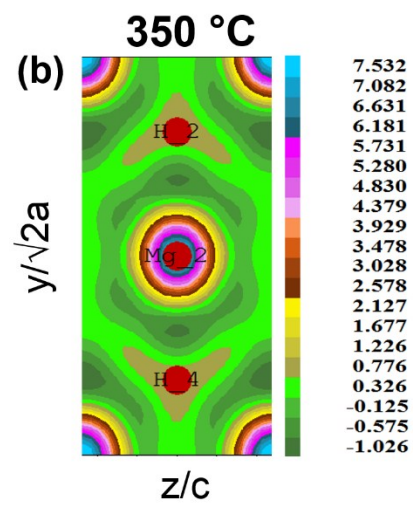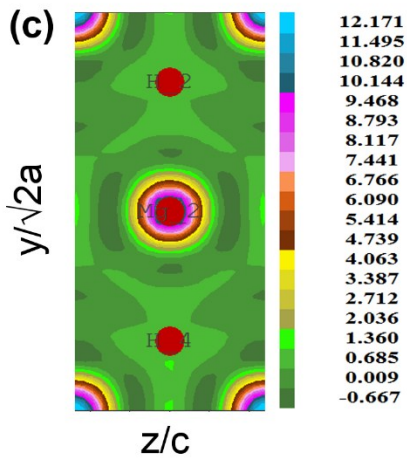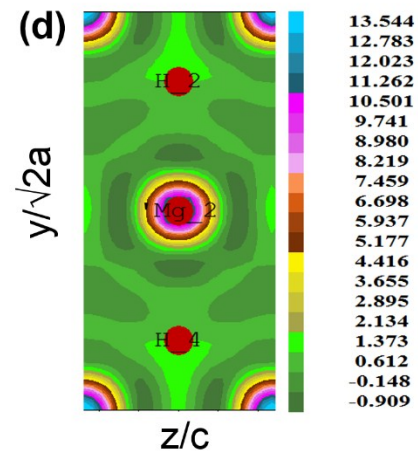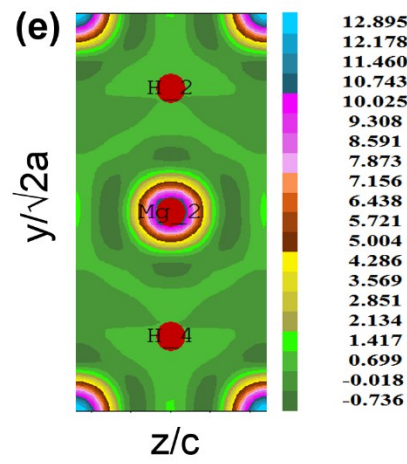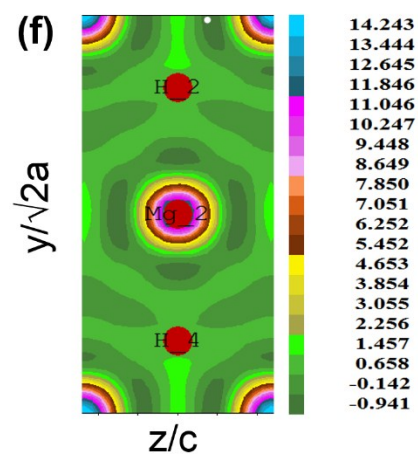

Fig. S3 Charge density maps of  $\text{MgH}_2$  in  $\{11\bar{2}0\}$  plane in powders dehydrogenated at 320 and 350 °C.

S4. The growth dimensionality ( $n$ ) values with standard uncertainties“(error bars indicate  $\pm\sigma$ )”.

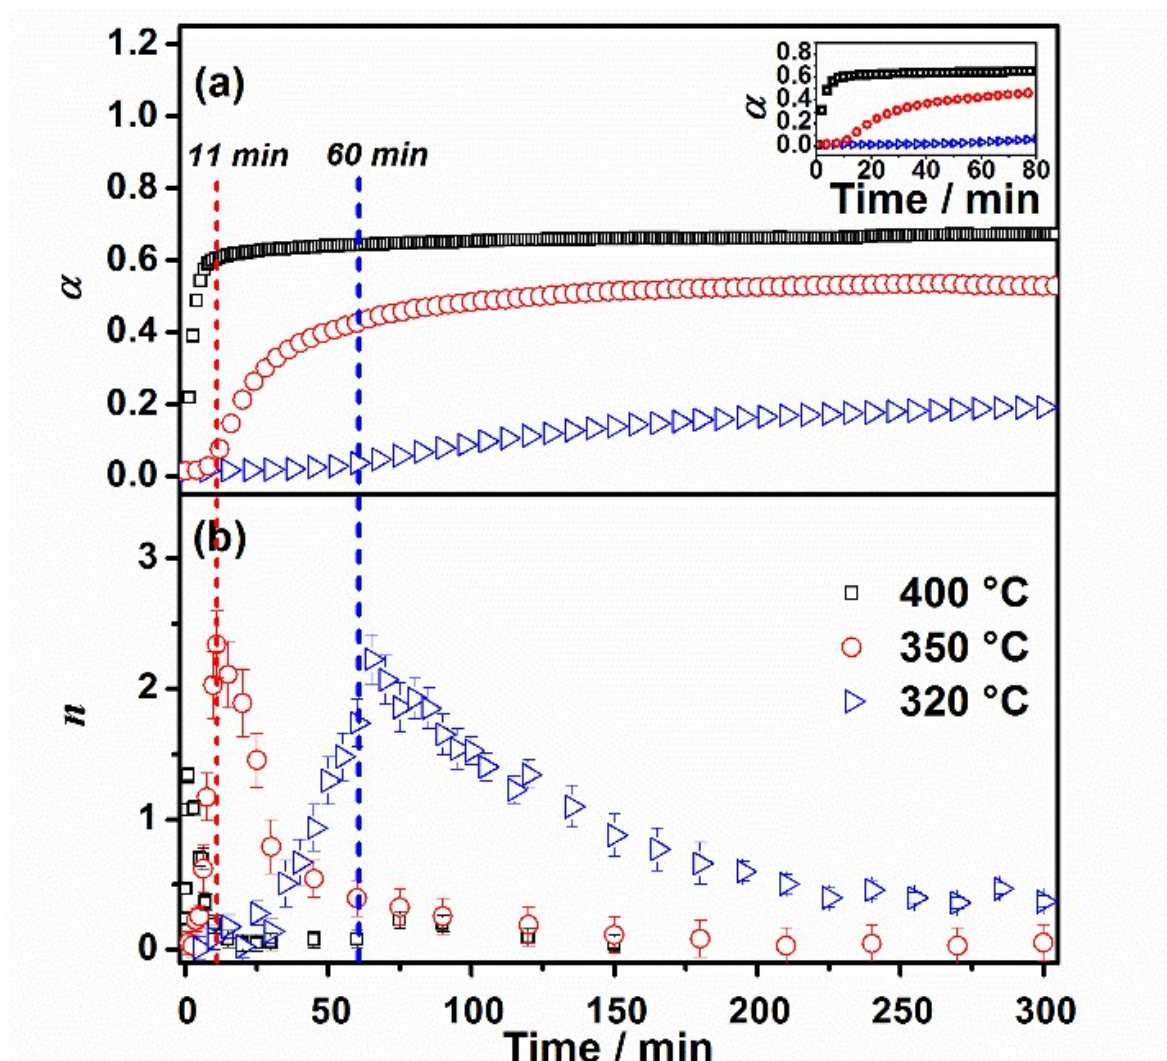

Fig. S4  $n$  values with standard uncertainties.

### S5. Estimation of activation energies for nucleation and growth during incubation period.

For estimation of activation energies dehydrogenation data at four different temperatures namely 320, 335, 350 and 400 °C are considered. The corresponding  $\alpha$ - $t$  and  $n$ - $t$  curves are shown in Figs. S5 (A) and S5 (B), respectively.

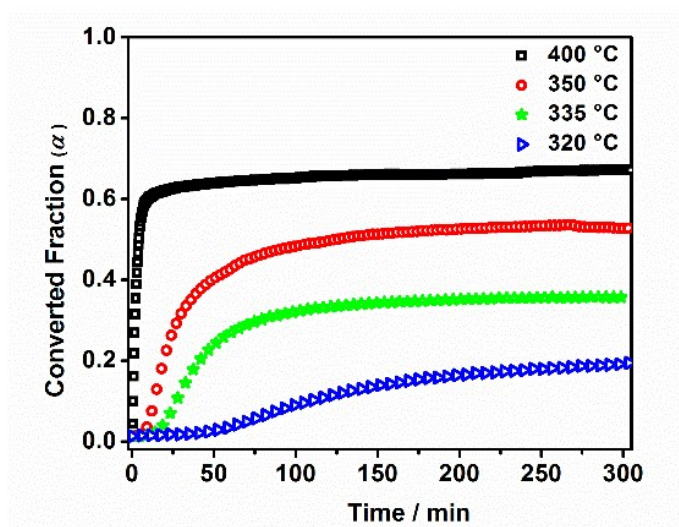

Fig. S5 (A) Converted fraction-time ( $\alpha$ - $t$ ) of  $\text{MgH}_2$  to Mg with dehydrogenation time for 320, 335, 350, and 400 °C.

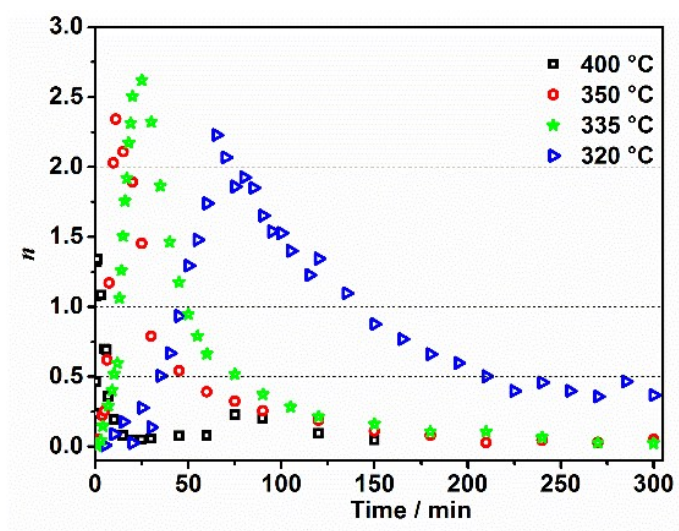

Fig. S5 (B) Growth dimensionality ( $n$ ) with dehydrogenation time for 320, 335, 350, and 400 °C.

The kinetic factor  $k$  for the reaction between Mg and MgH<sub>2</sub> is given as

$$k = k_g N_o U^n$$

where  $k_g$ : geometric factor (=4 $\pi$ /3: sphere ; =8: cube),  $N_o$ : number of available nucleation sites per unit volume of the particle and  $U$ : Mg/MgH<sub>2</sub> interface velocity<sup>3</sup>.

Table S5. Estimated  $k_g N_o$  and  $U$  from  $\ln(k)$  versus  $n$  plot during incubation period.

| Temperature (°C) | $U$      | $k_g N_o$ |
|------------------|----------|-----------|
| 320              | 0.000351 | 0.020038  |
| 335              | 0.001283 | 0.018867  |
| 350              | 0.005775 | 0.035300  |
| 400              | 0.065100 | 0.027100  |

The estimated activation energies for nucleation (from  $k_g N_o$ ) and growth (from  $U$ ) are 12 $\pm$ 2 and 209 $\pm$ 8 kJ/mol H, respectively.

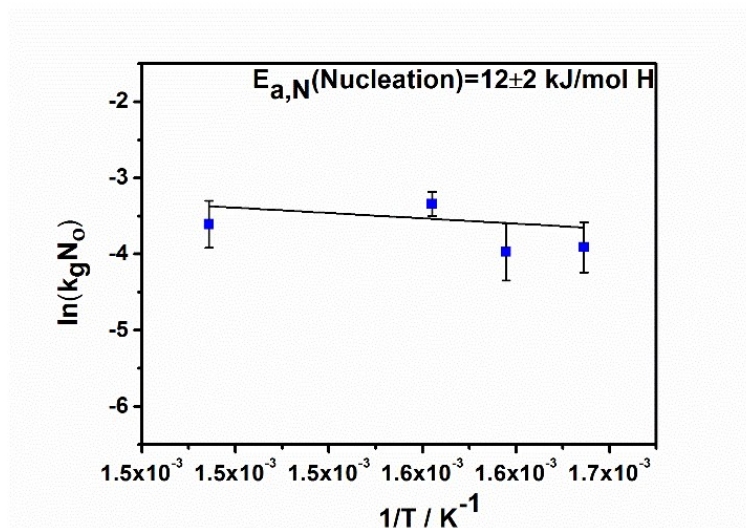

Fig. S5 (C)  $\ln(k_g N_o)$ - $1/T$  plot for estimation of activation energy for Nucleation (error bars indicate  $\pm\sigma$ ).



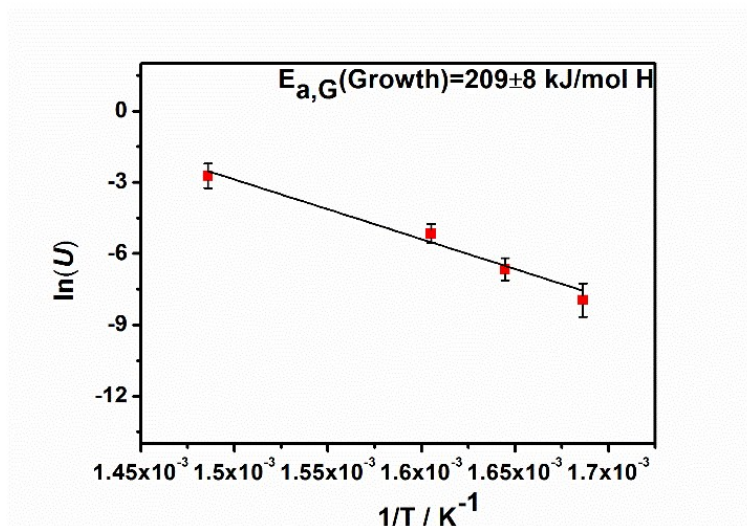

Fig. S5 (D)  $\ln(U)$ - $1/T$  plot for estimation of activation energy for Growth (error bars indicate  $\pm\sigma$ ).

## References

1. D. L. Sahagian and A. A. Proussevitch, *J. Volcanol. Geoth. Res.*, 1998, **84**, 173-196.
2. N. Bindzus and B. B. Iversen, *Acta Crystallogr. Sect. A*, 2012, **68**, 750-762.
3. M. H. Mintz and Y. Zeiri, *J. Alloys Compd.*, 1995, **216**, 159-175.
